# Supplementary material
Source: PubMed Central journal article supplement (PMC3730275)
Supplement: NIHMS491920-supplement-Supplement1.pdf [file NIHMS491920-supplement-Supplement1.pdf]

## Supplementary Appendix

This appendix has been provided by the authors to give readers additional information about their work.

Supplement to: Maxson JE, Gotlib J, Pollyea DA, et al. Oncogenic *CSF3R* mutations in chronic neutrophilic leukemia and atypical CML. *N Engl J Med* 2013;368:1781-90. DOI: 10.1056/NEJMoa1214514

# Supplemental Appendix

Supplement to: Maxson J, Gotlib J, et al. Gain-of-function *CSF3R* Mutations in Myeloproliferative Neoplasms

|                         |          |
|-------------------------|----------|
| <b>Contents</b>         | <b>1</b> |
| Full Study Methods      | 2 – 6    |
| Figure S1               | 7        |
| Figure S2               | 8        |
| Figure S3               | 9        |
| Tables S1, S2           | 10       |
| Table S3                | 11       |
| Table S4                | 12       |
| Supplemental References | 12       |

## **Full Study Methods**

### **Functional analysis of patient samples**

All clinical samples were obtained with informed consent with approval by the Institutional Review Boards of the University of Texas-Southwestern, University of Colorado, Stanford University, Washington University in St. Louis, or Oregon Health & Science University (OHSU). Bone marrow or blood samples from patients with acute leukemia were separated using a Ficoll gradient followed by red blood cell lysis; specimens from patients with CNL or aCML were processed with red blood cell lysis only. Cells were cultured in RPMI-1640 medium (Invitrogen) containing 10% fetal bovine serum (FBS, Atlanta Biologicals), L-glutamine (Invitrogen), fungizone (Invitrogen), penicillin/streptomycin (Invitrogen), and  $10^{-4}$  M 2-mercaptoethanol (Sigma). Screening of primary leukemia cells against panels of siRNA and kinase inhibitors was performed as previously described<sup>1-4</sup>.

### **Genomic analysis of patient samples**

Genomic DNA was isolated from cryopreserved patient sample material using Qiagen DNeasy columns. DNA was fragmented by sonication using an S2 Sonicator (Covaris). Fragmented DNA was then processed according to the SeqEZ protocol (Nimblegen/Roche), which is based on the TruSeq protocol (Illumina). Briefly, following fragmentation, DNA was blunt-ended and then 3' tailed with a single "A" nucleotide. Fragments were ligated to adaptors containing indexed barcodes. The library was then size selected using a 2% agarose gel. The recovered library was amplified by limited rounds of polymerase chain reaction (PCR). Solution capture was performed using a custom DNA probe capture library (Supplemental Tables S1 and S2). The library was hybridized to the probe set for 72 hours at 47°C. Captured DNA was then recovered from the probes and amplified by limited rounds of PCR. The amplified library was separated from

unincorporated nucleotides and primers using a QIAquick PCR purification column (Qiagen), followed by verification of the library using the Bioanalyzer (Agilent). Library concentration was determined using real time PCR on a StepOne Real Time System (Life Technologies). The libraries were sequenced on a HiSeq 2000 sequencer (Illumina) followed by FASTQ assembly using the CASAVA pipeline (Illumina). Sequence capture, library preparation, and deep sequencing were performed by the OHSU Massively Parallel Sequencing Shared Resource.

CSF3R mutations were confirmed by PCR amplification of CSF3R exons using M13-tagged primers (exon 14 F GTAAAACGACGGCCAGTCCACGGAGGCAGCTTTAC, exon 14 R CAGGAAACAGCTATGACCAAATCAGCATCCTTTGGGTG, exon 17 F GTAAAACGACGGCCAGTAGTGGCCCAAAGACACAGTC, exon 17 R CAGGAAACAGCTATGACCGGGAGTCCATAACAGCTCA) followed by purification of PCR products using Amicon Ultra 0.5 mL 30K Centrifugal Filters (Millipore) and Sanger sequencing with M13 forward (GTAAAACGACGGCCAGT) and reverse (CAGGAAACAGCTATGACC) primers. Sanger sequencing was performed by the OHSU DNA Sequence Analysis Shared Resource. Additional sequencing of CSF3R exons 14-17 was performed by Genewiz, Inc (South Plainfield, NJ).

### **Alignment and analysis of deep sequencing**

Reads were aligned using the BWA realignment algorithm<sup>5</sup> and genotyping was performed using the GATK toolkit<sup>6</sup> following the 'Best Protocol' of the 'Best Practice Variant Detection with the GATK v2' (<http://www.broadinstitute.org/gatk/>). Briefly, genotyping was performed after removing duplicate reads, local realignment around the 1000 Genome's indels and indels inferred from the gapped alignments of all samples (indels found in one sample helped inform the rest). Finally, the quality scores were recalibrated after excluding positions known to vary in dbSNP132.

Both single nucleotide variants (SNVs) and small indels were detected. The effect of the variants was initially assessed relative to Ensembl build 56 gene models<sup>7</sup>.

### **Vectors and cloning**

CSF3R transcript variant 1 (NM\_000760.2) pDONR vector was purchased from GeneCopoeia. CSF3R mutations were introduced using the QuikChange II XL site-directed mutagenesis kit (Agilent Technologies). CSF3R was cloned into the MSCV-IRES-green fluorescent protein (GFP) plasmid using the Gateway Cloning System (Invitrogen).

### **Cell culture and retrovirus generation**

293T17 cells were obtained from American Type Culture Collection (ATCC) and grown in Dulbecco's Modified Eagle's Medium (DMEM) (Invitrogen) containing 10% FBS, L-glutamine, fungizone and penicillin-streptomycin. 293T17 cells were transfected with FuGENE 6 (Promega). To generate murine retrovirus, 293T17 cells were transfected with MSCV-IRES-GFP constructs and EcoPac helper plasmid (a gift from Dr. Rick Van Etten, Tufts University, Boston, MA). Ba/F3 cells were obtained from ATCC and grown in RPMI 1640 medium with 10% FBS, L-glutamine, fungizone, penicillin-streptomycin, and 15% WEHI-conditioned medium (a source of IL3). Stable Ba/F3 cell lines were generated by infection of  $3 \times 10^6$  cells with 1 mL of murine retrovirus expressing WT CSF3R, CSF3R mutants or an empty control vector, followed by sorting GFP positive cells by FACSaria (BD Biosciences).

### **Ba/F3 transformation assays**

Parental Ba/F3 cells or those stably expressing WT CSF3R or CSF3R mutants were washed three times and re-suspended in RPMI 1640 with 10% FBS, L-glutamine, fungizone and

penicillin/streptomycin at a density of  $5 \times 10^5$  cells per mL. Viable cell counts were obtained using propidium iodide exclusion on a Guava Personal Cell Analysis System (Millipore).

### **Immunoblotting**

Ba/F3 cells stably expressing CSF3R constructs were lysed in Cell Lysis Buffer (Cell Signaling) containing Complete Mini Protease Inhibitor Cocktail Tablets (Roche), Phosphatase Inhibitor Cocktail 2 (Sigma) and Phenylmethanesulfonyl fluoride solution (Sigma) and then quantitated using the Pierce BCA Protein Assay Kit (Thermo Scientific). Lysates were diluted in sample buffer (75 mM Tris pH 6.8, 3% SCS, 15% glycerol, 8% B-mercaptoethanol, 0.1% bromophenol blue). Lysates were then separated by SDS-PAGE and transferred to polyvinylidene fluoride (PVDF) membrane (Millipore) and subjected to immunoblot analysis using the following antibodies: anti-GCSF Receptor (CSF3R) antibody (abcam, ab126167), anti-ACK1 (TNK2) antibody (abcam, ab74091), Phospho-STAT3 (Tyr705) (Cell Signaling Technologies (CST), 9131), Stat3 Antibody (CST, 9132), Phospho-Jak2 (Tyr1007/1008) Antibody (CST, 3771), JAK2 (D2E12) XP Rabbit mAb (CST, 3230), Phospho-Src Family (Tyr416) Antibody (CST, 2101), Src Antibody (CST, 2108), Anti-Actin (Ab-1) Mouse mAb (JLA20) (Calbiochem, CP01). All primary antibodies were used at a 1:1000 dilution, except for Actin, which was used at a 1:5000 dilution. Anti-mouse or anti-rabbit IgG HRP conjugate secondary antibodies (Promega) were used at a 1:5000 dilution and immunoblots were developed using SuperSignal West Pico Chemiluminescent Substrate (Thermo Scientific) on a Lummi Imager (Boehringer Mannheim).

### **Murine hematopoietic colony formation assays**

All mouse work was performed according to a protocol approved by the OHSU Institutional Animal Care and Use Committee. Bone marrow was isolated from 6-10 week old BALB/c mice

(The Jackson Laboratory), red blood cells were lysed using ammonium chloride solution (Stem Cell Technologies), cells were then washed and incubated overnight in pre-stimulation medium, DMEM, 10% FBS, L-glutamine, penicillin/streptomycin, 15% WEHI conditioned medium, 7 ng/mL recombinant murine IL-3 (Peprotech), 12 ng/mL recombinant murine IL-6 (Peprotech) and 56 ng/mL recombinant murine SCF (Peprotech). Cells were infected on two successive days with murine retrovirus expressing WT CSF3R, CSF3R S783fs, CSF3R T618I or an empty vector control. Four hours after the second infection, cells were washed three times and  $2.5 \times 10^4$  cells were plated in 1 mL of MethoCult® M3234 Methylcellulose Medium for Mouse Cells without cytokines (Stemcell Technologies) in triplicate. Recombinant human GCSF (Peprotech), dasatinib (LC laboratories) and ruxolitinib (Selleck Chemicals) were added to the medium prior to plating as described in the figures. Colony formation was scored manually by light microscopy one week after plating. Differences in response to dasatinib or ruxolitinib of CSF3R membrane proximal or truncation mutant colonies were evaluated for significance using a paired t-test with p-values as reported in the legend for Figure 2.

J.E.M., J.G., B.J.D., and J.W.T. designed the study, all authors gathered, analyzed, and vouch for the data and the analysis, J.E.M., J.G., D.A.P., C.A.E., C.E.T., B.J.D., and J.W.T. wrote the paper, and all authors reviewed and decided to publish the paper. J.E.M. and J.W.T. wrote the first draft of the paper. There were no agreements concerning confidentiality of the data between the sponsor and the authors or the institutions named in the credit lines.

# CNL Patient 10 (from Table 1) CSF3R T618I

Peripheral  
Blood

Bone  
Marrow  
Aspirate

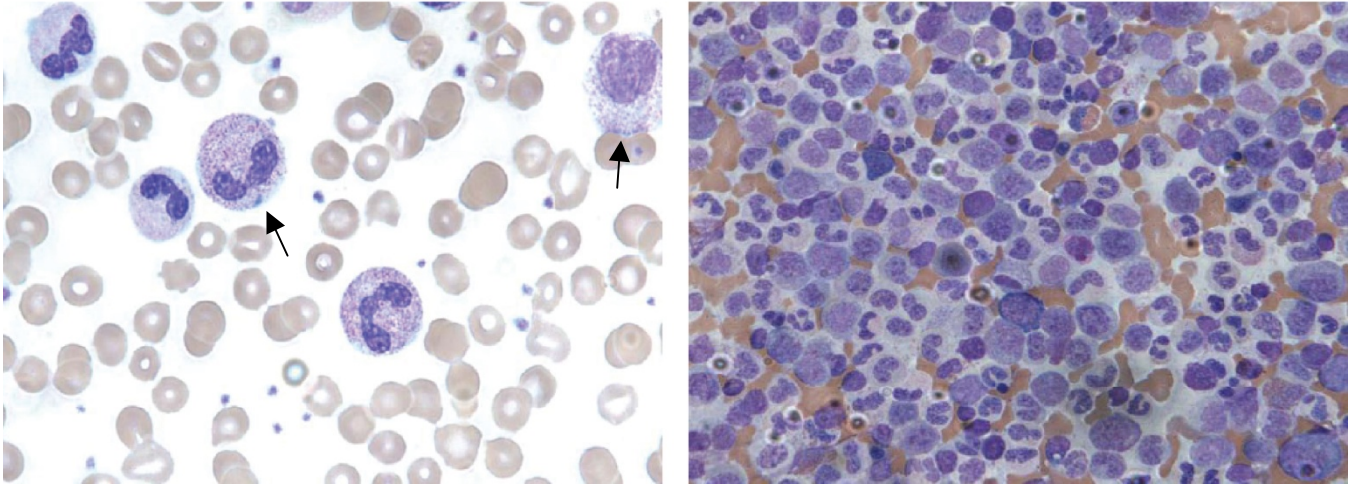

**Figure S1. Histopathology of peripheral blood and bone marrow aspirate from a patient with CNL**

Peripheral blood (patient #10, Table 1) showing segmented and band neutrophils with toxic granulation and Döhle bodies (arrow), common morphologic features among CNL and aCML patients carrying *CSF3R* mutations (Wright Giemsa stain, 1000x). The bone marrow aspirate from patient 10 reveals a marked myeloid hyperplasia with full spectrum maturation (Wright Giemsa stain, 400x). Courtesy Dr. Tracy George, University of New Mexico.



A

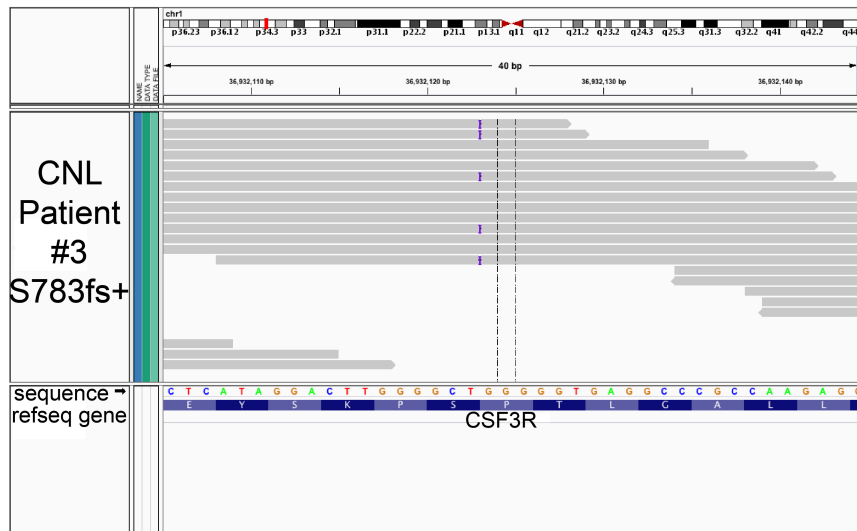

B

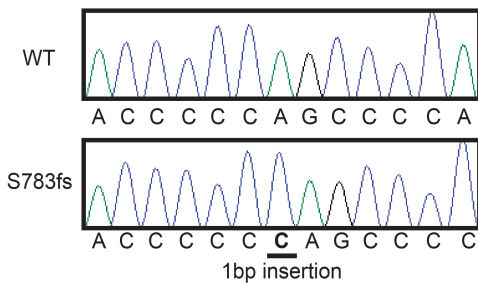

C

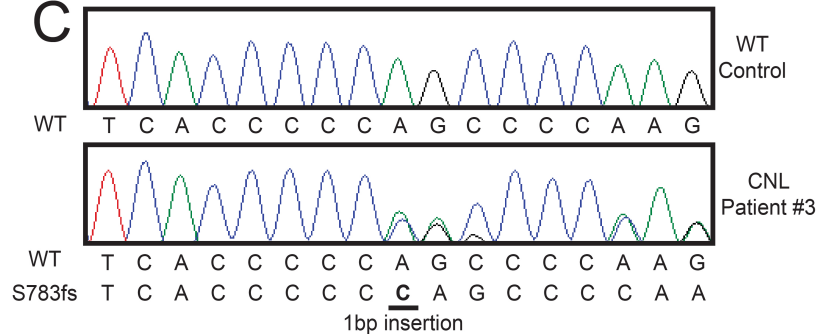

D

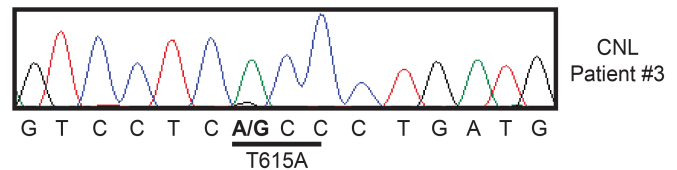

**Figure S2. *CSF3R* deep sequencing and Sanger validation for Patient #3**

**A.** The reads for *CSF3R* for the sample from Patient #3 (Table S3; *CSF3R* S783fs) at the point of insertion are shown. The T->TG insertion is shown by the purple lines in some of the reads (the genomic sequence is annotated in the opposite orientation on the genome browser as the transcript, in the transcript the mutation corresponds to A --> CA). Note that the dotted lines are simply a reference point. **B.** Genomic DNA flanking the 1 bp insertion in *CSF3R* from patient #3 was amplified and cloned into plasmids such that single clones could be sequenced to confirm the presence of a 1 bp insertion. Representative electropherograms of clones exhibiting the WT and S783fs alleles are shown. **C.** Direct Sanger sequencing of amplified genomic DNA from Patient #3 shows that the S783fs mutation is present at nearly 50% frequency, while the T615A mutation (**D**) is a very low frequency mutation. This is further supported by cloning and enumeration of sequenced PCR products from this same specimen as described in Table S4. In all electropherograms, A is denoted as a green line, C as a blue line, G as a black line and T as a red line.

A

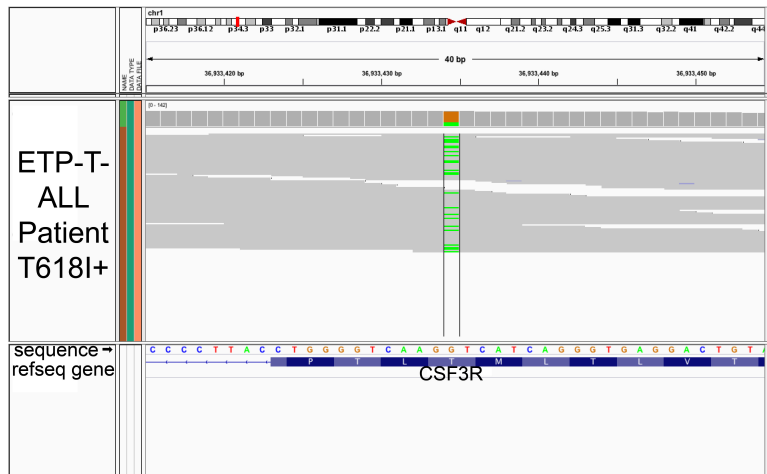

B

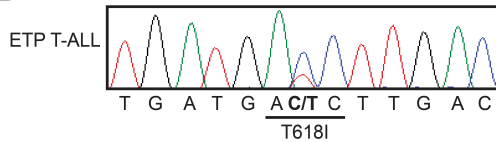

C

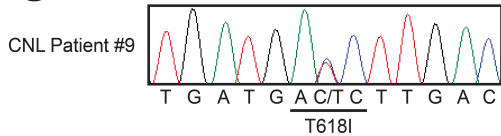

D

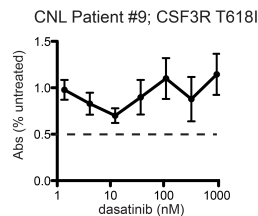

E

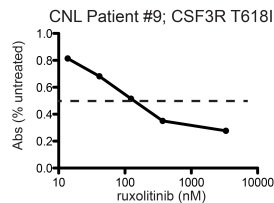

### Figure S3. *CSF3R* deep sequencing and Sanger validation for T618I-positive ETP-T-ALL and CNL Patient #9

**A.** Reads for *CSF3R* in the region of the T618I mutation are shown collapsed due to the large number of reads. The green bars indicate the reads with the G→A mutation corresponding to T618I (Note: since *CSF3R* is oriented in the reverse direction in the genome alignment, on the mRNA transcript the corresponding change is ACC (T) to ATC (I)). Coverage is shown above the reads and the rectangles are colored in the proportion to the reads bases. The colors are shown in the Sequence track. **B.** Sequencing of the ETP-T-ALL patient from (A) revealed a C to T mutation resulting in a T618I mutation in *CSF3R*. In the electropherogram, A is denoted as a green line, C as a blue line, G as a black line and T as a red line. **C.** Sequencing of the CNL patient #9 specimen from (D, E) revealed a T618I point mutation in *CSF3R*. The region surrounding the *CSF3R* T618I mutation was PCR amplified from genomic DNA and subjected to Sanger sequencing. A single base pair mutation (C to T) was found at approximately 50% frequency and the electropherograms for the region surrounding the mutation are shown. **D.** Cells from CNL patient #9 (Table S3) were tested for sensitivity to dasatinib. The dasatinib curves were run in triplicate and did not reach an IC<sub>50</sub>, even at the highest concentration tested (1000 nM). Values represent mean percent cell viability ± s.e.m. **E.** The same CNL patient sample (patient #9) was tested for sensitivity to ruxolitinib. The patient specimen was sensitive to ruxolitinib with an IC<sub>50</sub> of 127 nM. Values represent mean percent cell viability.

Supplemental Tables

**Table S1. Gene List for Exon Sequence Capture. (see separate file)**

**Table S2. Genomic Coordinates for Exon Sequence Capture. (see separate file)**

| Patient # | Diagnosis                          | CSF3R Mutation           | Gender/Age | (% Segmented + Band Neutrophils) / % Precursors | Highest recorded WBC (/ $\mu$ L) | WBC (/ $\mu$ L) | ANC (/ $\mu$ L) | Hb (g/dL) / Hct | Platelets (/ $\mu$ L) | MCV (fL)        |
|-----------|------------------------------------|--------------------------|------------|-------------------------------------------------|----------------------------------|-----------------|-----------------|-----------------|-----------------------|-----------------|
| 1         | aCML favored over CNL <sup>1</sup> | D771fs                   | M/67       | 82 (82 + 0) / <5                                | 20,000                           | 15,900          | 13,038          | 9.5/28.2        | 210,000               | 100.9           |
| 2         | aCML                               | G683R <sup>2</sup>       | F/50       | 70 (58 + 12) / 10                               | 42,000                           | 13,200          | 7,700           | 14.1/42.6       | 54,000                | 89.5            |
| 3         | CNL                                | S783fs/T615A             | M/73       | 82 (82 + 0) / <5                                | 64,000                           | 8,100           | 6,642           | 9.2/26.4        | 415,000               | 97.7            |
| 4         | aCML                               | T615A/Y752X              | M/70       | 42 (20 + 22) / 48                               | 270,000                          | 37,100          | 15,582          | 9.0/27.2        | 126,000               | 95.9            |
| 5         | CNL                                | T618I/D771fs             | F/76       | 77 (47 + 30) / 19                               | 94,500                           | 94,500          | 72,750          | 12.3/35.0       | 288,000               | 91.3            |
| 6         | CNL                                | T618I/E808K <sup>3</sup> | M/73       | 94 (94 + 0) / 0                                 | 271,000                          | 8,300           | 7,802           | 10.3/30         | 30,000                | 100.9           |
| 7         | aCML favored over CNL <sup>1</sup> | T618I/W791X              | M/71       | 94 (89 + 5) / 0                                 | 83,800                           | 56,700          | 53,298          | 10.4/32.3       | 215,000               | 90.5            |
| 8         | aCML                               | T618I                    | M/88       | 81 (65 + 16) / 7                                | 175,900                          | 38,100          | 24,800          | 8.8/24.5        | 98,000                | 92.3            |
| 9         | CNL                                | T618I                    | M/53       | 86 (81 + 5) / 9                                 | 108,100                          | 96,500          | 87,800          | 10.8/33.6       | 65,000                | 94.9            |
| 10        | CNL                                | T618I                    | F/73       | 96 (96 + 0) / 0                                 | 178,600                          | 178,600         | 171,456         | 7.5/22.2        | 83,000                | 111.3           |
| 11        | aCML favored over CNL <sup>1</sup> | T618I                    | M/77       | 95 (75 + 20) / <5                               | 39,100                           | 39,100          | 24,992          | 8.4/26.0        | 69,000                | 108.7           |
| 12        | CNL                                | T618I                    | M/69       | 87 (80 + 7) / 7                                 | 250,000                          | 115,500         | 100,485         | 8.3/ NA         | 129,000               | NA <sup>4</sup> |
| 13        | aCML                               | T618I                    | F/73       | 81 (58 + 23) / 6                                | 211,000                          | 98,700          | 79,947          | 11.2/34.6       | 271,000               | 93.2            |
| 14        | CNL                                | T618I                    | M/57       | 93 (93 + 0) / 0                                 | 63,800                           | 48,500          | 45,100          | 11.0/32.6       | 108,000               | 92.2            |
| 15        | CNL                                | T618I                    | M/67       | 88 (83 + 5) / 3                                 | 272,400                          | 163,000         | 154,900         | 8.8/25.8        | 22,000                | 90.5            |
| 16        | aCML                               | T618I                    | F/74       | 72 (62 + 10) / 24                               | 177,000                          | 105,000         | 75,600          | 9.9/29.6        | 88,000                | 78.2            |
| 17        | aCML                               | None                     | F/48       | 55 (40 + 15) / 7                                | 96,000                           | 80,100          | 51,264          | 10.2/32.5       | 204,000               | 96.3            |
| 18        | aCML                               | None                     | F/73       | 60 (53 + 7) / 26                                | 252,600                          | 133,200         | 79,920          | 8.3/27.8        | 117,000               | 85.1            |
| 19        | aCML                               | None                     | F/62       | 64 (64 + 0) / 0                                 | 42,900                           | 12,900          | 8,256           | 12.1/36.3       | 378,000               | 98.7            |
| 20        | aCML                               | None                     | M/87       | 50 (36 + 14) / 43                               | 47,000                           | 38,900          | 19,450          | 9.3/27.2        | 50,000                | 91.7            |
| 21        | CNL                                | None                     | M/86       | 92 (92 + 0) / 0                                 | 130,000                          | 73,200          | 67,344          | 11.2/36.7       | 190,000               | 81.4            |
| 22        | aCML                               | None                     | M/86       | 48 (42 + 6) / 49                                | 114,000                          | 114,000         | 54,720          | 7.7/23.7        | 8,000                 | 90.8            |
| 23        | aCML                               | None                     | M/80       | 58 (30 + 28) / 18                               | 64,100                           | 64,100          | 37,178          | 13.1/38.6       | 180,000               | 86.3            |
| 24        | aCML                               | None                     | M/74       | 89 (89 + 0) / 6-20                              | 41,300                           | 41,300          | 36,757          | 12.1/38.2       | 38,000                | 104.0           |
| 25        | aCML                               | None                     | F/49       | 48 (32 + 16) / 36                               | 69,100                           | 69,100          | 33,168          | 9.8/28.2        | 223,000               | 99.4            |
| 26        | aCML                               | None                     | M/71       | 61 (35 + 26) / 20                               | 102,000                          | 102,000         | 52,020          | 9.1/10.3        | 272,000               | 101             |
| 27        | aCML                               | None                     | F/76       | 69 (63 + 6) / 9                                 | 65,000                           | 18,000          | 12,420          | 9.2/26.1        | 295,000               | 84.3            |

**Table S3. Mutations in CSF3R are enriched in patients with neutrophilic leukemia.**

Leukemia patient samples were sequenced for CSF3R exons 14-17 encompassing the membrane proximal extracellular domain, transmembrane and cytoplasmic domains. CSF3R membrane proximal mutations are blue and truncation mutations are red. Compound mutations listed in predicted temporal order of acquisition by leukemic cells.

<sup>1</sup>aCML favored over CNL because of the presence of granulocytic dysplasia and/or prior WBC differentials showing > 10% immature precursors

<sup>2</sup>G683R not evaluated in Ba/F3 cells; this mutation is annotated in CSF3R transcript variant 3, because it is not present in variant 1; all other variants are annotated in transcript 1

<sup>3</sup>E808K Reported in<sup>8</sup>

<sup>4</sup>Unable to report due to high WBC indices

CNL – chronic neutrophilic leukemia; aCML – atypical chronic myeloid leukemia; WBC – White Blood Cell Count; ANC – Absolute Neutrophil Count; Hb/Hct – Hemoglobin and Hematocrit; MCV – Mean Corpuscular Volume

| Patient Number | CSF3R Mutations | Frequency |
|----------------|-----------------|-----------|
| 3              | None            | 3/9       |
| 3              | T615A only      | 0/9       |
| 3              | S783fs only     | 4/9       |
| 3              | S783fs/T615A    | 2/9       |
|                |                 |           |
| 5              | None            | 2/11      |
| 5              | T618I only      | 3/11      |
| 5              | D771fs only     | 0/11      |
| 5              | T618I/D771fs    | 6/11      |

**Table S4. CSF3R Compound mutations are on the same allele**

RNA was isolated from cryopreserved patient samples. cDNA was then synthesized and used to amplify a region of CSF3R encompassing both mutations. The PCR products were TOPO TA cloned (Invitrogen), transformed into *E. coli*, and individual clones were isolated from bacterial colonies and sequenced. The frequency of the mutations is listed as a fraction of the total colonies sequenced. Both patients had clones with both the membrane proximal point mutations and the truncation mutations, indicating that they were on the same allele. Patient #3 had some clones with only the S783fs mutation but not the T615A mutation, indicating that the S783fs mutation most likely arose first. This is consistent with the sequencing results from genomic DNA indicating that the T615A mutation was present at very low frequency (Figure S2). Patient #5 had clones with T618I only but not D771fs only, indicating that the T618I mutation likely preceded the D771fs mutation.

#### Supplemental References

1. Bicocca VT, Chang BH, Masouleh BK, et al. Crosstalk between ROR1 and the pre-B-Cell Receptor Promotes Survival of t(1;19) Acute Lymphoblastic Leukemia. *Cancer Cell* 2012;22:656-67.
2. Tyner JW, Deininger MW, Loriaux MM, et al. RNAi screen for rapid therapeutic target identification in leukemia patients. *Proc Natl Acad Sci U S A* 2009;106:8695-700.
3. Tyner JW, Walters DK, Willis SG, et al. RNAi screening of the tyrosine kinome identifies therapeutic targets in acute myeloid leukemia. *Blood* 2008;111:2238-45.
4. Tyner JW, Yang WF, Bankhead A, et al. Kinase Pathway Dependence in Primary Human Leukemias Determined by Rapid Inhibitor Screening. *Cancer Res* 2013;73:285-96.
5. Li H, Durbin R. Fast and accurate short read alignment with Burrows-Wheeler transform. *Bioinformatics* 2009;25:1754-60.
6. McKenna A, Hanna M, Banks E, et al. The Genome Analysis Toolkit: a MapReduce framework for analyzing next-generation DNA sequencing data. *Genome Res* 2010;20:1297-303.
7. Flicek P, Amode MR, Barrell D, et al. Ensembl 2012. *Nucleic Acids Res* 2012;40:D84-90.
8. Wolfler A, Erkeland SJ, Bodner C, et al. A functional single-nucleotide polymorphism of the G-CSF receptor gene predisposes individuals to high-risk myelodysplastic syndrome. *Blood* 2005;105:3731-6.
